# Supplementary material for: Asymptotic Ray Method for the Double Square Root Equation
Source: MDPI journal article supplement (doi:10.3390/jmse12040636), 2024-04-09
Supplement: s1 [file s1]

## SUPPLEMENTARY MATERIALS

Here we develop high-frequency asymptotic expansion of the DSR equation. We show that two-way travel time is governed by a nonlinear eikonal equation while amplitudes obey transport equation similar to that of classic wave-equation ray method. We start from the true-amplitude DSR equation obtained in [11] and follow the derivation presented in [10] with some modifications.

According to [11], true-amplitude DSR equation reads

$$\left(\frac{\partial}{\partial z} - i\Lambda_s - i\Lambda_r - \Gamma_s - \Gamma_r\right)u = 0, \quad (\text{S1})$$

where we used the same notation as in the main text.

As it is shown in [10], principal symbol of  $i\Lambda_{s/r}$  from (2) can be recast into

$$i\lambda_{s/r} = \frac{i\omega}{v_{s/r}} \left(1 - \frac{1}{\pi} \int_{-1}^1 \sqrt{1 - \xi^2} \frac{v_{s/r}^2 k_{s/r}^2}{\omega^2 - \xi^2 v_{s/r}^2 k_{s/r}^2} d\xi\right). \quad (\text{S2})$$

We introduce differential operators  $L_{s/r}(\xi)$  and  $\left(v_{s/r} \frac{\partial}{\partial x_{s/r}}\right)^2$  with principal symbols being:

$$\begin{aligned} L_{s/r}(\xi) &= \frac{\partial^2}{\partial t^2} - \xi^2 \left(v_{s/r} \frac{\partial}{\partial x_{s/r}}\right)^2 \leftrightarrow -(\omega^2 - \xi^2 v_{s/r}^2 k_{s/r}^2), \\ \left(v_{s/r} \frac{\partial}{\partial x_{s/r}}\right)^2 &= v_{s/r}^2 \frac{\partial^2}{\partial x_{s/r}^2} + v_{s/r} \frac{\partial v_{s/r}}{\partial x_{s/r}} \frac{\partial}{\partial x_{s/r}} \leftrightarrow v_{s/r}^2 k_{s/r}^2. \end{aligned} \quad (\text{S3})$$

One may think of symbol  $v_{s/r}^2 k_{s/r}^2$  appearing in numerator as of application of operator  $\left(v_{s/r} \frac{\partial}{\partial x_{s/r}}\right)^2$ . Accordingly, symbol  $\omega^2 - \xi^2 v_{s/r}^2 k_{s/r}^2$  in denominator might be interpreted as an inverse operator  $L_{s/r}^{-1}(\xi)$ . Keeping this in mind and recalling Fourier transform property  $\frac{\partial}{\partial t} \leftrightarrow i\omega$  we write down expressions for operators  $i\Lambda_{s/r}$  and  $\Gamma_{s/r}$  using (2), (S2) and (S3):

$$\begin{aligned} i\Lambda_{s/r} &= \frac{1}{v_{s/r}} \frac{\partial}{\partial t} \left( I - \frac{1}{\pi} \int_{-1}^1 \sqrt{1 - \xi^2} L_{s/r}^{-1}(\xi) \left(v_{s/r} \frac{\partial}{\partial x_{s/r}}\right)^2 d\xi \right), \\ \Gamma_{s/r} &= \frac{1}{2v_{s/r}} \frac{\partial v_{s/r}}{\partial z} \cdot \left( I + L_{s/r}^{-1}(1) \left(v_{s/r} \frac{\partial}{\partial x_{s/r}}\right)^2 \right). \end{aligned} \quad (\text{S4})$$

Operator  $I$  represents identity. Inserting (S4) into (S1) leads to equation

$$\begin{aligned} &\frac{\partial u}{\partial z} - \frac{1}{v_s} \frac{\partial}{\partial t} \left( u - \frac{1}{\pi} \int_{-1}^1 \sqrt{1 - \xi^2} L_s^{-1}(\xi) \left(v_s \frac{\partial}{\partial x_s}\right)^2 u \cdot d\xi \right) \\ &\quad - \frac{1}{v_r} \frac{\partial}{\partial t} \left( u - \frac{1}{\pi} \int_{-1}^1 \sqrt{1 - \xi^2} L_r^{-1}(\xi) \left(v_r \frac{\partial}{\partial x_r}\right)^2 u \cdot d\xi \right) \\ &\quad - \frac{1}{2v_s} \frac{\partial v_s}{\partial z} \cdot \left( u + L_s^{-1}(1) \left(v_s \frac{\partial}{\partial x_s}\right)^2 u \right) - \frac{1}{2v_r} \frac{\partial v_r}{\partial z} \cdot \left( u + L_r^{-1}(1) \left(v_r \frac{\partial}{\partial x_r}\right)^2 u \right) = 0. \end{aligned} \quad (\text{S5})$$

As in [10] we proceed with a new function

$$q_{s/r}(\xi; x_s, x_r, z, t): \quad L_{s/r}(\xi)q_{s/r} = \left( v_{s/r} \frac{\partial}{\partial x_{s/r}} \right)^2 u \quad (\text{S6})$$

allowing us to recast the DSR equation (S5) into its final form:

$$\begin{aligned} \frac{\partial u}{\partial z} - \frac{1}{v_s} \frac{\partial}{\partial t} \left( u - \frac{1}{\pi} \int_{-1}^1 \sqrt{1 - \xi^2} q_s(\xi; \dots) \cdot d\xi \right) \\ - \frac{1}{v_r} \frac{\partial}{\partial t} \left( u - \frac{1}{\pi} \int_{-1}^1 \sqrt{1 - \xi^2} q_r(\xi; \dots) \cdot d\xi \right) \\ - \frac{1}{2v_s} \frac{\partial v_s}{\partial z} \cdot (u + q_s(1; \dots)) - \frac{1}{2v_r} \frac{\partial v_r}{\partial z} \cdot (u + q_r(1; \dots)) = 0. \end{aligned} \quad (\text{S7})$$

We underline that all functions  $u$ ,  $q_s$  and  $q_r$  depend on both  $x_s$  and  $x_r$ . We also note that  $\xi$  is a dummy variable not appearing outside the integrals in the left-hand-side of the equation.

### Asymptotic expansions

We postulate asymptotic ray series expansions:

$$\left\{ \begin{array}{l} u(x_s, x_r, z, t) = \sum_{k=0}^{\infty} A_k(x_s, x_r, z) F_k(t - \tau(x_s, x_r, z)), \\ q_{s/r}(\xi; x_s, x_r, z, t) = \sum_{k=0}^{\infty} A_k^{s/r}(\xi; x_s, x_r, z) F_k(t - \tau(x_s, x_r, z)), \\ \frac{dF_k}{dt} = F_{k-1} \quad \forall k \geq 1. \end{array} \right. \quad (\text{S8})$$

When inserted into the DSR equation (S7), they lead to infinite equation involving terms  $\propto F'_0, F_0, F_1$  etc. We shall keep only two first ones. Let us develop each member in the left-hand-side of (S7) separately:

$$\frac{\partial u}{\partial z} = \frac{\partial}{\partial z} (A_0 F_0(t - \tau) + A_1 F_1(t - \tau) + \dots) = -\frac{\partial \tau}{\partial z} A_0 F'_0 + \left[ \frac{\partial A_0}{\partial z} - \frac{\partial \tau}{\partial z} A_1 \right] F_0 + \dots, \quad (\text{S9})$$

$$\begin{aligned} \frac{1}{v_{s/r}} \frac{\partial}{\partial t} \left( u - \frac{1}{\pi} \int_{-1}^1 \sqrt{1 - \xi^2} q_{s/r}(\xi; \dots) \cdot d\xi \right) = \\ = \frac{1}{v_{s/r}} \left[ A_0 - \frac{1}{\pi} \int_{-1}^1 \sqrt{1 - \xi^2} A_0^{s/r}(\xi; \dots) \cdot d\xi \right] F'_0 \\ + \frac{1}{v_{s/r}} \left[ A_1 - \frac{1}{\pi} \int_{-1}^1 \sqrt{1 - \xi^2} A_1^{s/r}(\xi; \dots) \cdot d\xi \right] F_0 + \dots, \end{aligned} \quad (\text{S10})$$

$$\frac{1}{2v_{s/r}} \frac{\partial v_{s/r}}{\partial z} \cdot (u + q_{s/r}(1; \dots)) = \frac{1}{2v_{s/r}} \frac{\partial v_{s/r}}{\partial z} \cdot [A_0 + A_0^{s/r}(1; \dots)] F_0 + \dots \quad (\text{S11})$$

Hence, asymptotic expansion of whole DSR equation reads

$$\begin{aligned}
(S7) \Rightarrow & - \left[ \frac{\partial \tau}{\partial z} A_0 + \frac{1}{v_s} \left( A_0 - \frac{1}{\pi} \int_{-1}^1 \sqrt{1 - \xi^2} A_0^s(\xi; \dots) \cdot d\xi \right) \right. \\
& \left. + \frac{1}{v_r} \left( A_0 - \frac{1}{\pi} \int_{-1}^1 \sqrt{1 - \xi^2} A_0^r(\xi; \dots) \cdot d\xi \right) \right] F'_0 + \\
& + \left[ \frac{\partial A_0}{\partial z} - \frac{\partial \tau}{\partial z} A_1 - \frac{1}{v_s} \left( A_1 - \frac{1}{\pi} \int_{-1}^1 \sqrt{1 - \xi^2} A_1^s(\xi; \dots) \cdot d\xi \right) \right. \\
& - \frac{1}{v_r} \left( A_1 - \frac{1}{\pi} \int_{-1}^1 \sqrt{1 - \xi^2} A_1^r(\xi; \dots) \cdot d\xi \right) - \frac{1}{2v_s} \frac{\partial v_s}{\partial z} (A_0 + A_0^s(1; \dots)) \\
& \left. - \frac{1}{2v_r} \frac{\partial v_r}{\partial z} (A_0 + A_0^r(1; \dots)) \right] F_0 + \dots = 0.
\end{aligned} \tag{S12}$$

We set the expressions inside square brackets to be zero independently of each other. Zeroing out coefficient before  $F'_0$  will lead to the eikonal equation and that before  $F_0$  – to the transport equation.

#### *Auxiliary formulae*

Integration with respect to  $\xi$  in (S12) requires expressions for  $A_0^{s/r}(\xi; \dots)$  and  $A_1^{s/r}(\xi; \dots)$  in terms of  $\xi$ ,  $A_0$  and  $A_1$ . One can obtain them by substituting ray series expansions into (S6). Once again, we develop both sides of the equation in turn:

$$\begin{aligned}
L_{s/r}(\xi) q_{s/r} = & \left[ 1 - \xi^2 v_{s/r}^2 \left( \frac{\partial \tau}{\partial x_{s/r}} \right)^2 \right] A_0^{s/r} F_0'' \\
& + \left[ \left( 1 - \xi^2 v_{s/r}^2 \left( \frac{\partial \tau}{\partial x_{s/r}} \right)^2 \right) A_1^{s/r} + \xi^2 B_{s/r}(A_0^{s/r}) \right] F'_0 + \dots,
\end{aligned} \tag{S13}$$

$$\left( v_{s/r} \frac{\partial}{\partial x_{s/r}} \right)^2 u = v_{s/r}^2 \left( \frac{\partial \tau}{\partial x_{s/r}} \right)^2 A_0 F_0'' + \left[ v_{s/r}^2 \left( \frac{\partial \tau}{\partial x_{s/r}} \right)^2 A_1 - B_{s/r}(A_0) \right] F'_0 + \dots, \tag{S14}$$

where we introduced a new shorthand notation:

$$B_{s/r}(A) \stackrel{\text{def}}{=} 2v_{s/r}^2 \frac{\partial \tau}{\partial x_{s/r}} \frac{\partial A}{\partial x_{s/r}} + \left( \left( v_{s/r} \frac{\partial}{\partial x_{s/r}} \right)^2 \tau \right) A. \tag{S15}$$

Equating coefficients before coinciding derivatives of  $F_0$  we obtain

$$(S6) \Rightarrow \begin{cases} \left( 1 - \xi^2 v_{s/r}^2 \left( \frac{\partial \tau}{\partial x_{s/r}} \right)^2 \right) A_0^{s/r} = v_{s/r}^2 \left( \frac{\partial \tau}{\partial x_{s/r}} \right)^2 A_0, \\ \left( 1 - \xi^2 v_{s/r}^2 \left( \frac{\partial \tau}{\partial x_{s/r}} \right)^2 \right) A_1^{s/r} + \xi^2 B_{s/r}(A_0^{s/r}) = \\ = v_{s/r}^2 \left( \frac{\partial \tau}{\partial x_{s/r}} \right)^2 A_1 - B_{s/r}(A_0). \end{cases} \tag{S16}$$

Hence, the following relations hold true:

$$\left\{ \begin{array}{l} A_0^{s/r} = \frac{v_{s/r}^2 \left( \frac{\partial \tau}{\partial x_{s/r}} \right)^2}{1 - \xi^2 v_{s/r}^2 \left( \frac{\partial \tau}{\partial x_{s/r}} \right)^2} A_0, \\ A_1^{s/r} = \frac{v_{s/r}^2 \left( \frac{\partial \tau}{\partial x_{s/r}} \right)^2}{1 - \xi^2 v_{s/r}^2 \left( \frac{\partial \tau}{\partial x_{s/r}} \right)^2} A_1 - \frac{\xi^2 B_{s/r}(A_0^{s/r}) + B_{s/r}(A_0)}{1 - \xi^2 v_{s/r}^2 \left( \frac{\partial \tau}{\partial x_{s/r}} \right)^2}. \end{array} \right. \quad (S17)$$

A few more expressions will be needed in the sequel. One can verify that

$$J_1^{s/r} = \frac{1}{\pi} \int_{-1}^1 \frac{\sqrt{1 - \xi^2}}{1 - \xi^2 v_{s/r}^2 \left( \frac{\partial \tau}{\partial x_{s/r}} \right)^2} \cdot d\xi = \frac{1 - \sqrt{1 - v_{s/r}^2 \left( \frac{\partial \tau}{\partial x_{s/r}} \right)^2}}{v_{s/r}^2 \left( \frac{\partial \tau}{\partial x_{s/r}} \right)^2}, \quad (S18)$$

$$J_2^{s/r} = \frac{1}{\pi} \int_{-1}^1 \frac{\sqrt{1 - \xi^2}}{\left( 1 - \xi^2 v_{s/r}^2 \left( \frac{\partial \tau}{\partial x_{s/r}} \right)^2 \right)^2} \cdot d\xi = \frac{1}{2 \sqrt{1 - v_{s/r}^2 \left( \frac{\partial \tau}{\partial x_{s/r}} \right)^2}}, \quad (S19)$$

$$\begin{aligned} J_3^{s/r} &= \frac{1}{\pi v_{s/r}} \int_{-1}^1 \frac{\xi^2 B_{s/r}(A_0^{s/r}) \sqrt{1 - \xi^2}}{1 - \xi^2 v_{s/r}^2 \left( \frac{\partial \tau}{\partial x_{s/r}} \right)^2} \cdot d\xi \\ &= \frac{v_{s/r} \frac{\partial \tau}{\partial x_{s/r}} \frac{\partial}{\partial x_{s/r}} \left( v_{s/r}^2 \left( \frac{\partial \tau}{\partial x_{s/r}} \right)^2 \right)}{4 \left( 1 - v_{s/r}^2 \left( \frac{\partial \tau}{\partial x_{s/r}} \right)^2 \right)^{\frac{3}{2}}} A_0 + \frac{B_{s/r}(A_0)}{v_{s/r}} [J_2^{s/r} - J_1^{s/r}]. \end{aligned} \quad (S20)$$

*Eikonal equation*

Now let us consider the coefficient with  $F'_0$  in (S12). Substituting expression for  $A_0^{s/r}$  from (S17) we obtain:

$$\begin{aligned} &\frac{\partial \tau}{\partial z} A_0 + \frac{1}{v_s} \left( A_0 - \frac{1}{\pi} \int_{-1}^1 \sqrt{1 - \xi^2} A_0^s(\xi; \dots) \cdot d\xi \right) \\ &\quad + \frac{1}{v_r} \left( A_0 - \frac{1}{\pi} \int_{-1}^1 \sqrt{1 - \xi^2} A_0^r(\xi; \dots) \cdot d\xi \right) = \\ &= \frac{\partial \tau}{\partial z} A_0 + \frac{1}{v_s} \left( 1 - v_s^2 \left( \frac{\partial \tau}{\partial x_s} \right)^2 J_1^s \right) A_0 + \frac{1}{v_r} \left( 1 - v_r^2 \left( \frac{\partial \tau}{\partial x_r} \right)^2 J_1^r \right) A_0 = 0. \end{aligned} \quad (S21)$$

Evaluation of  $J_1^{s/r}$  from (S18) yields the eikonal equation:

$$\frac{\partial \tau}{\partial z} = -\frac{1}{v_s} \sqrt{1 - v_s^2 \left( \frac{\partial \tau}{\partial x_s} \right)^2} - \frac{1}{v_r} \sqrt{1 - v_r^2 \left( \frac{\partial \tau}{\partial x_r} \right)^2}. \quad (\text{S22})$$

*Transport equation*

Transport equation involves more elaborate algebra. First, we recall the coefficient before  $F_0$  from (S12) which is set to be zero:

$$\begin{aligned} & \frac{\partial A_0}{\partial z} - \frac{\partial \tau}{\partial z} A_1 - \frac{1}{v_s} \left( A_1 - \frac{1}{\pi} \int_{-1}^1 \sqrt{1 - \xi^2} A_1^s(\xi; \dots) \cdot d\xi \right) \\ & - \frac{1}{v_r} \left( A_1 - \frac{1}{\pi} \int_{-1}^1 \sqrt{1 - \xi^2} A_1^r(\xi; \dots) \cdot d\xi \right) - \\ & - \frac{1}{2v_s} \frac{\partial v_s}{\partial z} (A_0 + A_0^s(1; \dots)) - \frac{1}{2v_r} \frac{\partial v_r}{\partial z} (A_0 + A_0^r(1; \dots)) = 0. \end{aligned} \quad (\text{S23})$$

We gather all terms involving  $A_1$  and  $A_1^{s/r}$  and denote them by  $C$ :

$$\begin{aligned} C \stackrel{\text{def}}{=} & -\frac{\partial \tau}{\partial z} A_1 - \frac{1}{v_s} \left( A_1 - \frac{1}{\pi} \int_{-1}^1 \sqrt{1 - \xi^2} A_1^s(\xi; \dots) \cdot d\xi \right) \\ & - \frac{1}{v_r} \left( A_1 - \frac{1}{\pi} \int_{-1}^1 \sqrt{1 - \xi^2} A_1^r(\xi; \dots) \cdot d\xi \right). \end{aligned} \quad (\text{S24})$$

Now we substitute  $A_1^{s/r}$  from (S17), yielding:

$$\begin{aligned} C = & -\frac{\partial \tau}{\partial z} A_1 - \frac{1}{v_s} \left( 1 - v_s^2 \left( \frac{\partial \tau}{\partial x_s} \right)^2 J_1^s \right) A_1 - \frac{1}{v_r} \left( 1 - v_r^2 \left( \frac{\partial \tau}{\partial x_r} \right)^2 J_1^r \right) A_1 \\ & - \frac{1}{\pi v_s} \int_{-1}^1 \frac{(\xi^2 B_s(A_0^s) + B_s(A_0)) \sqrt{1 - \xi^2}}{1 - \xi^2 v_s^2 \left( \frac{\partial \tau}{\partial x_s} \right)^2} \cdot d\xi \\ & - \frac{1}{\pi v_r} \int_{-1}^1 \frac{(\xi^2 B_r(A_0^r) + B_r(A_0)) \sqrt{1 - \xi^2}}{1 - \xi^2 v_r^2 \left( \frac{\partial \tau}{\partial x_r} \right)^2} \cdot d\xi. \end{aligned} \quad (\text{S25})$$

Comparing this equation to (S21) it is clear that terms  $\propto A_1$  vanish due to the eikonal equation, and, taking into account (S18) and (S20),

$$C = -J_3^s - J_3^r - \frac{B_s(A_0)}{v_s} J_1^s - \frac{B_r(A_0)}{v_r} J_1^r. \quad (\text{S26})$$

Expanding  $J_3^{s/r}$  from (S20) we write down final expression for  $C$ :

$$C = - \left( \frac{v_s \frac{\partial \tau}{\partial x_s} \frac{\partial}{\partial x_s} \left( v_s^2 \left( \frac{\partial \tau}{\partial x_s} \right)^2 \right)}{4 \left( 1 - v_s^2 \left( \frac{\partial \tau}{\partial x_s} \right)^2 \right)^{\frac{3}{2}}} A_0 + \frac{B_s(A_0)}{v_s} J_2^s \right) - \left( \frac{v_r \frac{\partial \tau}{\partial x_r} \frac{\partial}{\partial x_r} \left( v_r^2 \left( \frac{\partial \tau}{\partial x_r} \right)^2 \right)}{4 \left( 1 - v_r^2 \left( \frac{\partial \tau}{\partial x_r} \right)^2 \right)^{\frac{3}{2}}} A_0 + \frac{B_r(A_0)}{v_r} J_2^r \right). \quad (\text{S27})$$

Now we return to the equation (S23). We insert  $C$  in its place and expand remaining abbreviations  $B_{s/r}(A_0)J_2^{s/r}$  and  $A_0^{s/r}(1; \dots)$ . The result reads:

$$\begin{aligned} \frac{\partial A_0}{\partial z} & - \frac{v_s \frac{\partial \tau}{\partial x_s} \frac{\partial}{\partial x_s} \left( v_s^2 \left( \frac{\partial \tau}{\partial x_s} \right)^2 \right)}{4 \left( 1 - v_s^2 \left( \frac{\partial \tau}{\partial x_s} \right)^2 \right)^{\frac{3}{2}}} A_0 - \frac{2v_s^2 \frac{\partial \tau}{\partial x_s} \frac{\partial A_0}{\partial x_s} + \left( \left( v_s \frac{\partial}{\partial x_s} \right)^2 \tau \right) A_0}{2v_s \sqrt{1 - v_s^2 \left( \frac{\partial \tau}{\partial x_s} \right)^2}} \\ & - \frac{v_r \frac{\partial \tau}{\partial x_r} \frac{\partial}{\partial x_r} \left( v_r^2 \left( \frac{\partial \tau}{\partial x_r} \right)^2 \right)}{4 \left( 1 - v_r^2 \left( \frac{\partial \tau}{\partial x_r} \right)^2 \right)^{\frac{3}{2}}} A_0 - \frac{2v_r^2 \frac{\partial \tau}{\partial x_r} \frac{\partial A_0}{\partial x_r} + \left( \left( v_r \frac{\partial}{\partial x_r} \right)^2 \tau \right) A_0}{2v_r \sqrt{1 - v_r^2 \left( \frac{\partial \tau}{\partial x_r} \right)^2}} \\ & - \frac{1}{2v_s} \frac{\partial v_s}{\partial z} \left( A_0 + \frac{v_s^2 \left( \frac{\partial \tau}{\partial x_s} \right)^2 A_0}{1 - v_s^2 \left( \frac{\partial \tau}{\partial x_s} \right)^2} \right) - \frac{1}{2v_r} \frac{\partial v_r}{\partial z} \left( A_0 + \frac{v_r^2 \left( \frac{\partial \tau}{\partial x_r} \right)^2 A_0}{1 - v_r^2 \left( \frac{\partial \tau}{\partial x_r} \right)^2} \right) = 0. \end{aligned} \quad (\text{S28})$$

Developing this equation, we obtain:

$$\begin{aligned}
& \frac{\partial A_0}{\partial z} - \frac{v_s \frac{\partial \tau}{\partial x_s} \frac{\partial A_0}{\partial x_s}}{\sqrt{1 - v_s^2 \left( \frac{\partial \tau}{\partial x_s} \right)^2}} - \frac{v_r \frac{\partial \tau}{\partial x_r} \frac{\partial A_0}{\partial x_r}}{\sqrt{1 - v_r^2 \left( \frac{\partial \tau}{\partial x_r} \right)^2}} \\
& - \frac{A_0}{2} \left[ \frac{v_s \frac{\partial^2 \tau}{\partial x_s^2}}{\left( 1 - v_s^2 \left( \frac{\partial \tau}{\partial x_s} \right)^2 \right)^{\frac{3}{2}}} + \frac{\frac{\partial v_s}{\partial x_s} \frac{\partial \tau}{\partial x_s}}{\left( 1 - v_s^2 \left( \frac{\partial \tau}{\partial x_s} \right)^2 \right)^{\frac{3}{2}}} \right] \\
& - \frac{A_0}{2} \left[ \frac{v_r \frac{\partial^2 \tau}{\partial x_r^2}}{\left( 1 - v_r^2 \left( \frac{\partial \tau}{\partial x_r} \right)^2 \right)^{\frac{3}{2}}} + \frac{\frac{\partial v_r}{\partial x_r} \frac{\partial \tau}{\partial x_r}}{\left( 1 - v_r^2 \left( \frac{\partial \tau}{\partial x_r} \right)^2 \right)^{\frac{3}{2}}} \right] \\
& - \frac{A_0}{2} \left[ \frac{\frac{1}{v_s} \frac{\partial v_s}{\partial z}}{1 - v_s^2 \left( \frac{\partial \tau}{\partial x_s} \right)^2} + \frac{\frac{1}{v_r} \frac{\partial v_r}{\partial z}}{1 - v_r^2 \left( \frac{\partial \tau}{\partial x_r} \right)^2} \right] = 0.
\end{aligned} \tag{S29}$$

This is the transport equation for the DSR equation. In order to make it more similar to its standard ray method counterpart, we multiply this equation by  $\frac{\partial \tau}{\partial z}$  while keeping in mind the eikonal equation (S22):

$$\begin{aligned}
& \frac{\partial \tau}{\partial z} \frac{\partial A_0}{\partial z} + \frac{\partial \tau}{\partial x_s} \frac{\partial A_0}{\partial x_s} \left( 1 + \frac{v_s}{v_r} \sqrt{\frac{1 - v_r^2 \left( \frac{\partial \tau}{\partial x_r} \right)^2}{1 - v_s^2 \left( \frac{\partial \tau}{\partial x_s} \right)^2}} \right) + \frac{\partial \tau}{\partial x_r} \frac{\partial A_0}{\partial x_r} \left( 1 + \frac{v_r}{v_s} \sqrt{\frac{1 - v_s^2 \left( \frac{\partial \tau}{\partial x_s} \right)^2}{1 - v_r^2 \left( \frac{\partial \tau}{\partial x_r} \right)^2}} \right) \\
& + \frac{A_0}{2} \left[ \frac{\frac{\partial^2 \tau}{\partial x_s^2} + \frac{1}{v_s} \frac{\partial v_s}{\partial x_s} \frac{\partial \tau}{\partial x_s}}{1 - v_s^2 \left( \frac{\partial \tau}{\partial x_s} \right)^2} \left( 1 + \frac{v_s}{v_r} \sqrt{\frac{1 - v_r^2 \left( \frac{\partial \tau}{\partial x_r} \right)^2}{1 - v_s^2 \left( \frac{\partial \tau}{\partial x_s} \right)^2}} \right) \right. \\
& \quad \left. + \frac{\frac{\partial^2 \tau}{\partial x_r^2} + \frac{1}{v_r} \frac{\partial v_r}{\partial x_r} \frac{\partial \tau}{\partial x_r}}{1 - v_r^2 \left( \frac{\partial \tau}{\partial x_r} \right)^2} \left( 1 + \frac{v_r}{v_s} \sqrt{\frac{1 - v_s^2 \left( \frac{\partial \tau}{\partial x_s} \right)^2}{1 - v_r^2 \left( \frac{\partial \tau}{\partial x_r} \right)^2}} \right) \right] \\
& + \frac{A_0}{2} \left[ \frac{\frac{1}{v_s^2} \frac{\partial v_s}{\partial z}}{\sqrt{1 - v_s^2 \left( \frac{\partial \tau}{\partial x_s} \right)^2}} \left( 1 + \frac{v_s}{v_r} \sqrt{\frac{1 - v_r^2 \left( \frac{\partial \tau}{\partial x_r} \right)^2}{1 - v_s^2 \left( \frac{\partial \tau}{\partial x_s} \right)^2}} \right) \right. \\
& \quad \left. + \frac{\frac{1}{v_r^2} \frac{\partial v_r}{\partial z}}{\sqrt{1 - v_r^2 \left( \frac{\partial \tau}{\partial x_r} \right)^2}} \left( 1 + \frac{v_r}{v_s} \sqrt{\frac{1 - v_s^2 \left( \frac{\partial \tau}{\partial x_s} \right)^2}{1 - v_r^2 \left( \frac{\partial \tau}{\partial x_r} \right)^2}} \right) \right] = 0.
\end{aligned} \tag{S30}$$

We note that

$$\begin{aligned}
0 &= \frac{\partial}{\partial z} \left( \frac{\partial \tau}{\partial z} - \frac{\partial \tau}{\partial z} \right) = \frac{\partial}{\partial z} \left( \frac{\partial \tau}{\partial z} + \frac{1}{v_s} \sqrt{1 - v_s^2 \left( \frac{\partial \tau}{\partial x_s} \right)^2} + \frac{1}{v_r} \sqrt{1 - v_r^2 \left( \frac{\partial \tau}{\partial x_r} \right)^2} \right) = \\
& \frac{\partial^2 \tau}{\partial z^2} - \left[ \frac{v_s^2 \left( \frac{\partial \tau}{\partial x_s} \right)^2 \frac{\partial^2 \tau}{\partial x_s^2} + \frac{1}{v_s} \frac{\partial v_s}{\partial x_s} \frac{\partial \tau}{\partial x_s}}{1 - v_s^2 \left( \frac{\partial \tau}{\partial x_s} \right)^2} + \frac{v_r^2 \left( \frac{\partial \tau}{\partial x_r} \right)^2 \frac{\partial^2 \tau}{\partial x_r^2} + \frac{1}{v_r} \frac{\partial v_r}{\partial x_r} \frac{\partial \tau}{\partial x_r}}{1 - v_r^2 \left( \frac{\partial \tau}{\partial x_r} \right)^2} \right] - \\
& - \left[ \frac{\frac{1}{v_s^2} \frac{\partial v_s}{\partial z}}{\sqrt{1 - v_s^2 \left( \frac{\partial \tau}{\partial x_s} \right)^2}} + \frac{\frac{1}{v_r^2} \frac{\partial v_r}{\partial z}}{\sqrt{1 - v_r^2 \left( \frac{\partial \tau}{\partial x_r} \right)^2}} \right] - \frac{2v_s v_r \frac{\partial \tau}{\partial x_s} \frac{\partial \tau}{\partial x_r} \frac{\partial^2 \tau}{\partial x_s \partial x_r}}{\sqrt{1 - v_s^2 \left( \frac{\partial \tau}{\partial x_s} \right)^2} \sqrt{1 - v_r^2 \left( \frac{\partial \tau}{\partial x_r} \right)^2}} = 0,
\end{aligned} \tag{S31}$$

where we changed order of differentiation  $\frac{\partial}{\partial z} \left( \frac{\partial \tau}{\partial x_{s/r}} \right) = \frac{\partial}{\partial x_{s/r}} \left( \frac{\partial \tau}{\partial z} \right)$  and once again substituted  $\frac{\partial \tau}{\partial z}$  from the eikonal equation (S22). This enables us to rewrite the transport equation (S30):



$$\begin{aligned}
& (S30) + \frac{A_0}{2} \frac{\partial}{\partial z} \left( \frac{\partial \tau}{\partial z} - \frac{\partial \tau}{\partial z} \right) = \frac{\partial \tau}{\partial z} \frac{\partial A_0}{\partial z} + \\
& + \frac{\partial \tau}{\partial x_s} \frac{\partial A_0}{\partial x_s} \left( 1 + \frac{v_s}{v_r} \sqrt{\frac{1 - v_r^2 \left( \frac{\partial \tau}{\partial x_r} \right)^2}{1 - v_s^2 \left( \frac{\partial \tau}{\partial x_s} \right)^2}} \right) + \frac{\partial \tau}{\partial x_r} \frac{\partial A_0}{\partial x_r} \left( 1 + \frac{v_r}{v_s} \sqrt{\frac{1 - v_s^2 \left( \frac{\partial \tau}{\partial x_s} \right)^2}{1 - v_r^2 \left( \frac{\partial \tau}{\partial x_r} \right)^2}} \right) + \\
& + \frac{A_0}{2} \left[ \frac{\partial^2 \tau}{\partial x_s^2} + \frac{\partial^2 \tau}{\partial x_r^2} + \frac{\partial^2 \tau}{\partial z^2} - \frac{2v_s v_r \frac{\partial \tau}{\partial x_s} \frac{\partial \tau}{\partial x_r} \frac{\partial^2 \tau}{\partial x_s \partial x_r}}{\sqrt{1 - v_s^2 \left( \frac{\partial \tau}{\partial x_s} \right)^2} \sqrt{1 - v_r^2 \left( \frac{\partial \tau}{\partial x_r} \right)^2}} + \right. \\
& + \frac{\frac{v_s}{v_r} \frac{\partial^2 \tau}{\partial x_s^2} + \frac{1}{v_r} \frac{\partial v_s}{\partial x_s} \frac{\partial \tau}{\partial x_s}}{1 - v_s^2 \left( \frac{\partial \tau}{\partial x_s} \right)^2} \sqrt{\frac{1 - v_r^2 \left( \frac{\partial \tau}{\partial x_r} \right)^2}{1 - v_s^2 \left( \frac{\partial \tau}{\partial x_s} \right)^2}} + \frac{\frac{v_r}{v_s} \frac{\partial^2 \tau}{\partial x_r^2} + \frac{1}{v_s} \frac{\partial v_r}{\partial x_r} \frac{\partial \tau}{\partial x_r}}{1 - v_r^2 \left( \frac{\partial \tau}{\partial x_r} \right)^2} \sqrt{\frac{1 - v_s^2 \left( \frac{\partial \tau}{\partial x_s} \right)^2}{1 - v_r^2 \left( \frac{\partial \tau}{\partial x_r} \right)^2}} \left. \right] \\
& + \frac{A_0}{2} \left[ \frac{\frac{1}{v_s v_r} \frac{\partial v_s}{\partial z} \sqrt{1 - v_r^2 \left( \frac{\partial \tau}{\partial x_r} \right)^2}}{1 - v_s^2 \left( \frac{\partial \tau}{\partial x_s} \right)^2} + \frac{\frac{1}{v_s v_r} \frac{\partial v_r}{\partial z} \sqrt{1 - v_s^2 \left( \frac{\partial \tau}{\partial x_s} \right)^2}}{1 - v_r^2 \left( \frac{\partial \tau}{\partial x_r} \right)^2} \right] = 0.
\end{aligned} \tag{S32}$$

Now we introduce a new vector:

$$\nabla_{DSR} \tau \stackrel{\text{def}}{=} \begin{bmatrix} \frac{\partial \tau}{\partial x_s} \left( 1 + \frac{v_s}{v_r} \sqrt{\frac{1 - v_r^2 \left( \frac{\partial \tau}{\partial x_r} \right)^2}{1 - v_s^2 \left( \frac{\partial \tau}{\partial x_s} \right)^2}} \right) \\ \frac{\partial \tau}{\partial x_r} \left( 1 + \frac{v_r}{v_s} \sqrt{\frac{1 - v_s^2 \left( \frac{\partial \tau}{\partial x_s} \right)^2}{1 - v_r^2 \left( \frac{\partial \tau}{\partial x_r} \right)^2}} \right) \\ \frac{\partial \tau}{\partial z} \end{bmatrix} \tag{S33}$$

and write down a derivative of its “horizontal” components:

$$\begin{aligned}
& \frac{\partial}{\partial x_{s/r}} \left[ \frac{\partial \tau}{\partial x_{s/r}} \left( 1 + \frac{v_{s/r}}{v_{r/s}} \sqrt{\frac{1 - v_{r/s}^2 \left( \frac{\partial \tau}{\partial x_{r/s}} \right)^2}{1 - v_{s/r}^2 \left( \frac{\partial \tau}{\partial x_{s/r}} \right)^2}} \right) \right] \\
&= \frac{\partial^2 \tau}{\partial x_{s/r}^2} + \frac{\frac{v_{s/r}}{v_{r/s}} \frac{\partial^2 \tau}{\partial x_{s/r}^2} + \frac{1}{v_{r/s}} \frac{\partial v_{s/r}}{\partial x_{s/r}} \frac{\partial \tau}{\partial x_{s/r}}}{1 - v_{s/r}^2 \left( \frac{\partial \tau}{\partial x_{s/r}} \right)^2} \sqrt{\frac{1 - v_{r/s}^2 \left( \frac{\partial \tau}{\partial x_{r/s}} \right)^2}{1 - v_{s/r}^2 \left( \frac{\partial \tau}{\partial x_{s/r}} \right)^2}} \\
&\quad - \frac{v_s v_r \frac{\partial \tau}{\partial x_s} \frac{\partial \tau}{\partial x_r} \frac{\partial^2 \tau}{\partial x_s \partial x_r}}{\sqrt{1 - v_s^2 \left( \frac{\partial \tau}{\partial x_s} \right)^2} \sqrt{1 - v_r^2 \left( \frac{\partial \tau}{\partial x_r} \right)^2}}
\end{aligned} \tag{S34}$$

Comparing (S34) and (S32) it is clear that transport equation can be written in terms of  $\nabla_{DSR}\tau$ , namely:

$$\begin{aligned}
& \langle \nabla A_0, \nabla_{DSR}\tau \rangle + \frac{1}{2} A_0 \langle \nabla, \nabla_{DSR}\tau \rangle + \\
& \frac{A_0}{2} \left[ \frac{\frac{1}{v_s v_r} \frac{\partial v_s}{\partial z} \sqrt{1 - v_r^2 \left( \frac{\partial \tau}{\partial x_r} \right)^2}}{1 - v_s^2 \left( \frac{\partial \tau}{\partial x_s} \right)^2} + \frac{\frac{1}{v_s v_r} \frac{\partial v_r}{\partial z} \sqrt{1 - v_s^2 \left( \frac{\partial \tau}{\partial x_s} \right)^2}}{1 - v_r^2 \left( \frac{\partial \tau}{\partial x_r} \right)^2} \right] = 0.
\end{aligned} \tag{S35}$$

This equation accomplishes our derivation. For further development see the main text.
